# Supplementary material
Source: HighWire-hosted journal article supplement (https://heart.bmj.com/content/106/7/512)

---

**SUPPLEMENTAL MATERIAL**

---

**Literature search strategy****Embase 1974 to 2015 September 17**

1. exp aorta valve/
2. exp aorta valve stenosis/
3. exp mitral valve/
4. exp mitral valve stenosis/
5. exp mitral valve regurgitation/
6. valvular heart disease/
7. (left adj2 valv\*).af.
8. (native adj2 valve\*).af.
9. (mitral adj2 valve\*).af.
10. (aortic adj2 valve\*).af.
11. or/1-10
12. exp pregnancy/
13. exp pregnancy complication/
14. exp pregnancy outcome/
15. exp Apgar score/
16. exp birth weight/
17. exp crown rump length/
18. (exp body weight/ or ((body adj2 weight) or (body adj2 length)).mp.) and infant/
19. crown-rump.tw.
20. (birth weight or birthweight).tw.
21. (apgar adj2 score\*).tw.
22. (fetal\* adj2 outcome).tw.
23. (obstetric\* adj2 (complication\* or outcome\*)).tw.
24. pregnan\*.tw.
25. or/12-24
26. 11 and 25
27. (exp animals/ or exp animal experimentation/ or nonhuman/) not ((exp animals/ or exp animal experimentation/ or nonhuman/) and exp human/)
28. 26 not 27
29. limit 28 to (book or book series or conference abstract or conference paper or conference proceeding or "conference review" or letter or note or short survey or trade journal)
30. 28 not 29
31. limit 30 to yr="1985 -Current"

**MEDLINE(R) 1946 to Present September 17, 2015**

1. exp Pregnancy/
2. Pregnancy Complications/
3. exp Pregnancy Outcome/
4. exp Apgar Score/
5. exp Birth Weight/

6. exp crown-rump length/
7. pregnan\*.tw.
8. (obstetric\* adj2 outcome\*).tw.
9. (fet\* adj2 outcome\*).tw.
10. (apgar adj2 score\*).tw.
11. (birthweight or birth weight).tw.
12. crown-rump\*.tw.
13. (exp Body Weight/ or ((body adj2 weight) or (body adj2 length)).mp.) and infant/
14. or/1-13
15. exp Aortic Valve/
16. exp Aortic Valve Stenosis/
17. exp Mitral Valve/
18. exp mitral valve stenosis/
19. exp mitral valve insufficiency/
20. Heart Valve Diseases/
21. (left adj2 valv\*).af.
22. (native adj2 valve\*).af.
23. (mitral adj2 valv\*).af.
24. (aortic adj2 valv\*).af.
25. or/15-24
26. 14 and 25
27. animals/ not (animals/ and humans/)
28. 26 not 27
29. limit 28 to yr="1985 -Current"

**Supplementary Table 1: Description of Excluded Studies**

| Number | Name       | Year | Country    | Reason for exclusion                | Notes                                                                                              |
|--------|------------|------|------------|-------------------------------------|----------------------------------------------------------------------------------------------------|
| 1      | Abdi       | 2012 | Iran       | All patients underwent intervention | Case series of PMBV                                                                                |
| 2      | Abid       | 1990 | Tunisia    | All patients underwent intervention | Case series of closed mitral commissurotomy                                                        |
| 3      | Abouziad   | 2001 | USA        | All patients underwent intervention | Case series of PMBV                                                                                |
| 4      | Aggarwal   | 2004 | India      | All patients underwent intervention | Case series of closed mitral commissurotomy                                                        |
| 5      | Aka        | 2015 | Turkey     | Insufficient data obtained          | Data grouped and severity of valve disease not provided. Outcome not specifically linked to lesion |
| 6      | Akhter     | 2011 | Bangladesh | Insufficient data obtained          | Data grouped and severity of valve disease not provided. Outcome not specifically linked to lesion |
| 7      | Ali Oto    | 1997 | Turkey     | Less than 5 cases                   |                                                                                                    |
| 8      | Arnoni     | 2003 | Brazil     | All patients underwent intervention | Case series of cardiac surgery in pregnancy                                                        |
| 9      | Aroni      | 2003 | Brazil     | Insufficient data obtained          | Data grouped and severity of valve disease not provided. Outcome not specifically linked to lesion |
| 10     | Arora      | 2002 | India      | All patients underwent intervention | Case series of PMBV                                                                                |
| 11     | Bachowski  | 1996 | Poland     | Less than 5 cases                   |                                                                                                    |
| 12     | Banning    | 1993 | UK         | Less than 5 cases                   |                                                                                                    |
| 13     | Ben Farhat | 1997 | Tunisia    | Duplicate Data                      | Duplicate data/overlap to Ben Farhat 1997, Gamra 2007                                              |
| 14     | Ben Farhat | 1995 | Tunisia    | Duplicate Data                      | Duplicate data/overlap to Ben Farhat 1997                                                          |
| 15     | Bernard    | 1991 | France     | Not population of interest          | Non-pregnant patients                                                                              |
| 16     | Bhatla     | 2003 | India      | Insufficient data obtained          | Data grouped and severity of valve disease not provided. Outcome not specifically linked to lesion |

|    |              |      |             |                                     |                                                                                                    |
|----|--------------|------|-------------|-------------------------------------|----------------------------------------------------------------------------------------------------|
| 17 | Birincioglu  | 1999 | Turkey      | All patients underwent intervention | Case series of closed mitral commissurotomy and mitral valve replacement.                          |
| 18 | Birincioglu  | 2014 | Turkey      | Insufficient data obtained          | Data grouped and severity of valve disease not provided. Outcome not specifically linked to lesion |
| 19 | Biswas       | 2003 | India       | Insufficient data obtained          | Data grouped and severity of valve disease not provided. Outcome not specifically linked to lesion |
| 20 | Borges       | 2011 | Brazil      | No outcome of interest              | Structural changes in cardiac chambers with mitral regurgitation in pregnancy. No outcome data.    |
| 21 | Borna        | 2006 | Iran        | Not population of interest          | Data grouped and severity of valve disease not provided. Outcome not specifically linked to lesion |
| 22 | Chen         | 2011 | Taiwan      | Not lesion of interest              | Study describes pregnancy in mitral valve prolapse but does not quantify mitral regurgitation      |
| 23 | Chia         | 1994 | Singapore   | Not lesion of interest              | Study describes pregnancy in mitral valve prolapse but does not quantify mitral regurgitation      |
| 24 | Chia         | 1996 | Singapore   | Not population of interest          | Data grouped and severity of valve disease not provided. Outcome not specifically linked to lesion |
| 25 | Chmielak     | 2011 | Poland      | All patients underwent intervention | Case series of PMBV                                                                                |
| 26 | Cornette     | 2013 | Netherlands | Not population of interest          | Data grouped and severity of valve disease not provided. Outcome not specifically linked to lesion |
| 27 | Dawson       | 2012 | USA         | Less than 5 cases                   |                                                                                                    |
| 28 | Del Castillo | 1992 | Brazil      | All patients underwent intervention | Case series of PMBV                                                                                |
| 29 | DeSouza      | 2001 | Brazil      | All patients underwent intervention | Case series of PMBV and open mitral commissurotomy                                                 |
| 30 | Devabhaktuni | 2010 | India       | Insufficient data obtained          | Data grouped and severity of valve disease not provided. Outcome not specifically linked to lesion |

|    |             |      |              |                                     |                                                                                                    |
|----|-------------|------|--------------|-------------------------------------|----------------------------------------------------------------------------------------------------|
| 31 | Dob         | 2001 | UK           | Insufficient data obtained          | Data grouped and severity of valve disease not provided. Outcome not specifically linked to lesion |
| 32 | Dommissie   | 1996 | South Africa | All patients underwent intervention | Case series of PMBV                                                                                |
| 33 | Doshi       | 2010 | India        | Insufficient data obtained          | Data grouped and severity of valve disease not provided. Outcome not specifically linked to lesion |
| 34 | Drenthen    | 2010 | ZAHARA       | Insufficient data obtained          | Data grouped and severity of valve disease not provided. Outcome not specifically linked to lesion |
| 35 | Elassy      | 2014 | Egypt        | Less than 5 cases                   |                                                                                                    |
| 36 | Esteves     | 2006 | Brazil       | All patients underwent intervention | Case series of PMBV                                                                                |
| 37 | Esteves     | 1991 | Brazil       | Duplicate Data                      | Duplicate data/overlap to Esteves 2006                                                             |
| 38 | Faiz        | 2003 | Saudi Arabia | Insufficient data obtained          | Did not grade valve severity or separate outcomes based on valve lesion                            |
| 39 | Farhat      | 1992 | Tunisia      | Duplicate Data                      | Duplicate data/overlap to Ben Farhat 1997 , Gamra 2006                                             |
| 40 | Fawzy       | 2001 | Saudi Arabia | All patients underwent intervention | Case series of PMBV                                                                                |
| 41 | Fawzy       | 1996 | Saudi Arabia | All patients underwent intervention | Case series of PMBV but no pregnancy outcomes recorded.                                            |
| 42 | Gamra       | 2006 | Tunisia      | All patients underwent intervention | Case series of PMBV                                                                                |
| 43 | Goon        | 1987 | Malaysia     | All patients underwent intervention | Case series of closed mitral commissurotomy                                                        |
| 44 | Gulraze     | 2014 | Saudi Arabia | Duplicate Data                      | Duplicate data/overlap to Fawzy 2001                                                               |
| 45 | Gupta       | 1998 | India        | All patients underwent intervention | Case series of PMBV                                                                                |
| 46 | Haththotuwa | 2009 | Sri Lanka    | Not population of interest          | Data reported a series of maternal deaths                                                          |
| 47 | Hiralal     | 2012 | India        | Insufficient data obtained          | Data grouped and severity of valve disease not provided. Outcome not specifically linked to lesion |

|    |              |      |              |                                     |                                                                                                           |
|----|--------------|------|--------------|-------------------------------------|-----------------------------------------------------------------------------------------------------------|
| 48 | Hosseinzadeh | 2018 | Iran         | Insufficient data obtained          | Data grouped and severity of valve disease not provided. Outcome not specifically linked to lesion        |
| 49 | Hsieh        | 1993 | Taiwan       | Insufficient data obtained          | Only evaluated rheumatic heart disease and mitral valve prolapse but did not specify lesion or severity.  |
| 50 | Imani        | 2013 | Iran         | Not population of interest          | Did not grade valve severity or separate outcomes based on valve lesion                                   |
| 51 | Iskan        | 2006 | Turkey       | All patients underwent intervention | Case series of cardiac surgery in pregnancy                                                               |
| 52 | Isogal       | 2018 | Japan        | Insufficient data obtained          | Data grouped and severity of valve disease not provided. Outcome not specifically linked to lesion        |
| 53 | Jahangiri    | 2003 | UK           | Not lesion of interest              | Case series of re-do aortic valve replacement and ascending aorta replacement                             |
| 54 | Jain         | 2013 | India        | Insufficient data obtained          | Did not grade valve severity or separate outcomes based on valve lesion                                   |
| 55 | John         | 2011 | USA          | Less than 5 cases                   |                                                                                                           |
| 56 | Joshi        | 2015 | India        | All patients underwent intervention | Case series of PMBV                                                                                       |
| 57 | Karabulut    | 2010 | Iran         | Not population of interest          | Data on maternal deaths in pregnancy not representative population of valvular heart disease in pregnancy |
| 58 | Karla        | 1994 | India        | All patients underwent intervention | Case series of PMBV                                                                                       |
| 59 | Khursheed    | 2015 | India        | Insufficient data obtained          | Did not grade valve severity or separate outcomes based on valve lesion                                   |
| 60 | Kinsara      | 2002 | Saudi Arabia | All patients underwent intervention | Case series of PMBV                                                                                       |
| 61 | Konar        | 2012 | India        | Insufficient data obtained          | Data grouped and severity of valve disease not provided. Outcome not specifically linked to lesion        |
| 62 | Koregol      | 2009 | India        | Insufficient data obtained          | Data grouped and severity of valve disease not provided. Outcome not specifically linked to lesion        |

|    |                       |      |        |                                     |                                                                                                                                       |
|----|-----------------------|------|--------|-------------------------------------|---------------------------------------------------------------------------------------------------------------------------------------|
| 63 | Kotrolou-Sotriopoulou | 2015 | USA    | Insufficient data obtained          | Data grouped. Outcome not specifically linked to lesion                                                                               |
| 64 | Kuczkowski            | 2004 | USA    | Less than 5 cases                   |                                                                                                                                       |
| 65 | Langford              | 2009 | UK     | Less than 5 cases                   |                                                                                                                                       |
| 66 | Lao                   | 1993 | Canada | Duplicate Data                      | Duplicate data/overlap to Silversides 2003                                                                                            |
| 67 | Lao                   | 1993 | Canada | Less than 5 cases                   |                                                                                                                                       |
| 68 | Lerman                | 2013 | Israel | Not lesion of interest              | Discussed mitral valve prolapse and mitral regurgitation but did not quantify regurgitation or isolate outcomes                       |
| 69 | Lesniak               | 1999 | Poland | Duplicate Data                      | Duplicate data/overlap to Lesniak-Sobelga 2004                                                                                        |
| 70 | Lewis                 | 2002 | UK     | Insufficient data obtained          | Did not separate outcomes based on severity of valve lesion.                                                                          |
| 71 | Liu                   | 2012 | China  | Insufficient data obtained          | Mixed population of heart disease. Data grouped and severity of valve disease not provided. Outcome not specifically linked to lesion |
| 72 | Liu                   | 2010 | China  | Insufficient data obtained          | Mixed population of heart disease. Data grouped and severity of valve disease not provided. Outcome not specifically linked to lesion |
| 73 | Lung                  | 1993 | France | All patients underwent intervention | Case series of PMBV                                                                                                                   |
| 74 | Lung                  | 2000 | France | Less than 5 cases                   |                                                                                                                                       |
| 75 | Madazili              | 2010 | Turkey | Insufficient data obtained          | Mixed population of heart disease. Data grouped and severity of valve disease not provided. Outcome not specifically linked to lesion |
| 76 | Mahoori               | 2007 | Iran   | All patients underwent intervention | Case series of cardiac surgery in pregnancy                                                                                           |
| 77 | Malhorta              | 2004 | India  | Insufficient data obtained          | Data grouped and severity of valve disease not provided. Outcome not specifically linked to lesion                                    |
| 78 | Malhotra              | 2006 | UK     | Insufficient data obtained          | Pooled data on maternal deaths. No specific outcomes for specific valve lesions.                                                      |

|    |                 |      |              |                                     |                                                                                                                           |
|----|-----------------|------|--------------|-------------------------------------|---------------------------------------------------------------------------------------------------------------------------|
|    |                 |      |              |                                     | Reported total 8 cases of valvular heart disease.                                                                         |
| 79 | Malhotra        | 2003 | India        | Insufficient data obtained          | Did not grade valve severity or separate outcomes based on valve lesion                                                   |
| 80 | Mangione        | 2000 | Brazil       | All patients underwent intervention | Case series of PMBV                                                                                                       |
| 81 | Mangione        | 1989 | Brazil       | Duplicate Data                      | Duplicate data/overlap to Mangione 2000                                                                                   |
| 82 | Martinez-Reding | 1998 | Mexico       | All patients underwent intervention | Case series of PMBV                                                                                                       |
| 83 | Matorras        | 1986 | Spain        | Insufficient data obtained          | Patients with mitral stenosis who underwent intervention. Did not quantify severity of valve disease.                     |
| 84 | McCredie        | 1998 | Australia    | Not population of interest          | Outcomes of pregnancies not provided.                                                                                     |
| 85 | McKeller        | 2011 | USA          | No outcome of interest              | Evaluated patients with bicuspid aortic valve in pregnancy and lifetime dissection risk. Did not quantify valve severity. |
| 86 | Merz            | 2011 | Germany      | Insufficient data obtained          | Data grouped. Outcome not specifically linked to lesion                                                                   |
| 87 | Meyer           | 1994 | USA          | Insufficient data obtained          | Data grouped. Outcome not specifically linked to lesion                                                                   |
| 88 | Mishra          | 2001 | India        | All patients underwent intervention | Case series of PMBV with no outcome data                                                                                  |
| 89 | Motiang         | 2017 | South Africa | Not population of interest          | Only included obstetric cases admitted to ICU. Not specifically valvular heart disease.                                   |
| 90 | Nercolini       | 2002 | Brazil       | All patients underwent intervention | Case series of PMBV                                                                                                       |
| 91 | Ngan            | 1999 | China        | Less than 5 cases                   |                                                                                                                           |
| 92 | Nqayana         | 2008 | South Africa | Insufficient data obtained          | Did not grade valve severity or separate outcomes based on valve lesion                                                   |
| 93 | Oliveria        | 1996 | Brazil       | Insufficient data obtained          | Data grouped and severity of valve disease not provided. Outcome not specifically linked to lesion                        |
| 94 | Ordenoglu       | 1995 | Turkey       | Less than 5 cases                   |                                                                                                                           |



|     |                 |      |              |                                     |                                                                                                                                       |
|-----|-----------------|------|--------------|-------------------------------------|---------------------------------------------------------------------------------------------------------------------------------------|
| 95  | Orme            | 2003 | UK           | Less than 5 cases                   |                                                                                                                                       |
| 96  | Oto             | 1997 | Turkey       | Less than 5 cases                   |                                                                                                                                       |
| 97  | Patel           | 1993 | South Africa | All patients underwent intervention | Case series of PMBV                                                                                                                   |
| 98  | Patel           | 2015 | USA          | Insufficient data obtained          | Retrospective review of stillbirths. Does not breakdown type of maternal valve disease.                                               |
| 99  | Pavankumar      | 1988 | India        | All patients underwent intervention | Case series of closed mitral commissurotomy                                                                                           |
| 100 | Pijuan-Domenech | 2015 | Spain        | Insufficient data obtained          | Mixed population of heart disease. Data grouped and severity of valve disease not provided. Outcome not specifically linked to lesion |
| 101 | Rahman          | 2000 | Saudi Arabia | Insufficient data obtained          | Data grouped and severity of valve disease not provided. Outcome not specifically linked to lesion                                    |
| 102 | Rezk            | 2016 | Egypt        | Insufficient data obtained          | Data grouped and severity of valve disease not provided. Outcome not specifically linked to lesion                                    |
| 103 | Rezk            | 2016 | Egypt        | Insufficient data obtained          | Data grouped and severity of valve disease not provided. Outcome not specifically linked to lesion                                    |
| 104 | Rezk            | 2018 | Egypt        | Insufficient data obtained          | Data grouped and severity of valve disease not provided. Outcome not specifically linked to lesion                                    |
| 105 | Riberio         | 1992 | Saudi Arabia | All patients underwent intervention | Case series of PMBV                                                                                                                   |
| 106 | Rooh-Hesslink   | 2006 |              | No outcome of interest              | Literature review                                                                                                                     |
| 107 | Roos-Hesselink  | 2013 | ROPAC        | Insufficient data obtained          | Mixed population of heart disease. Data grouped and severity of valve disease not provided. Outcome not specifically linked to lesion |
| 108 | Rose            | 1987 | USA          | Less than 5 cases                   |                                                                                                                                       |
| 109 | Routray         | 2003 | India        | All patients underwent intervention | Case series of PMBV                                                                                                                   |

|     |              |      |              |                                     |                                                                                                       |
|-----|--------------|------|--------------|-------------------------------------|-------------------------------------------------------------------------------------------------------|
| 110 | Ruys         | 2014 | ROPAC        | Insufficient data obtained          | Data grouped. Outcome not specifically linked to lesion                                               |
| 111 | Ruys         | 2014 | ROPAC        | Insufficient data obtained          | Data grouped. Outcome not specifically linked to lesion                                               |
| 112 | Ruzyllo      | 1992 | Poland       | Duplicate Data                      | Duplicate data/overlap to Chmielak 2011                                                               |
| 113 | Salehi       | 2013 | Iran         | All patients underwent intervention | Case series of PMBV                                                                                   |
| 114 | Salome       | 2002 | Portugal     | Less than 5 cases                   |                                                                                                       |
| 115 | Samiei       | 2016 | Iran         | No outcome of interest              | Imaging outcomes. Did not link severity of lesion to outcome of interest.                             |
| 116 | Santacesaria | 2016 | Italy        | Insufficient data obtained          | Data grouped and severity of valve disease not provided. Outcome not specifically linked to lesion    |
| 117 | Sartain      | 2012 | Australia    | Insufficient data obtained          | Data grouped and severity of valve disease not provided. Outcome not specifically linked to lesion    |
| 118 | Savzivand    | 2016 | Iran         | Insufficient data obtained          | Data grouped and severity of valve disease not provided. Outcome not specifically linked to lesion    |
| 119 | Sawhney      | 2002 | India        | All patients underwent intervention | Case series of closed mitral commisurotomy and PMBV                                                   |
| 120 | Sayeeda      | 2008 | Bangladesh   | Insufficient data obtained          | Data grouped and severity of valve disease not provided. Outcome not specifically linked to lesion    |
| 121 | Schoon       | 1997 | South Africa | Insufficient data obtained          | Data grouped and severity of valve disease not provided. Outcome not specifically linked to lesion    |
| 122 | Senanes      | 1994 | France       | Duplicate Data                      | Duplicate data/overlap to Lung 1993                                                                   |
| 123 | Shapiro      | 1985 | USA          | Not lesion of interest              | Study describes pregnancy in mitral valve prolapse but does not report mitral regurgitation or degree |
| 124 | Sharma       | 2017 | Nepal        | Insufficient data obtained          | Data grouped and severity of valve disease not provided. Outcome not specifically linked to lesion    |
| 125 | Shime        | 1987 | Canada       | Insufficient data obtained          | Did not grade valve severity or separate outcomes based on valve lesion                               |

|     |                 |      |              |                                     |                                                                                                                                       |
|-----|-----------------|------|--------------|-------------------------------------|---------------------------------------------------------------------------------------------------------------------------------------|
| 126 | Sidik           | 2006 | Israel       | Insufficient data obtained          | Data grouped and severity of valve disease not provided. Outcome not specifically linked to lesion                                    |
| 127 | Sirithaweessit  | 2014 | Thailand     | Insufficient data obtained          | Did not grade valve severity or separate outcomes based on valve lesion                                                               |
| 128 | Siu             | 1997 | Canada       | Duplicate Data                      | Duplicate data/overlap to Silversides 2003                                                                                            |
| 129 | Siu             | 2001 | Canada       | Insufficient data obtained          | Data grouped and severity of valve disease not provided. Outcome not specifically linked to lesion                                    |
| 130 | Sivadasanpillai | 2005 | India        | All patients underwent intervention | Case series of PMBV                                                                                                                   |
| 131 | Soma-Pillay     | 2008 | South Africa | Insufficient data obtained          | Data grouped and severity of valve disease not provided. Outcome not specifically linked to lesion                                    |
| 132 | Stephen         | 1992 | Sri Lanka    | All patients underwent intervention | Case series of closed mitral commisurotomy                                                                                            |
| 133 | Subbaiah        | 2013 | India        | Insufficient data obtained          | Data grouped and severity of valve disease not provided. Outcome not specifically linked to lesion                                    |
| 134 | Subbarao        | 2004 | India        | All patients underwent intervention | Case series of mitral commisurotomy                                                                                                   |
| 135 | Sugishita       | 1986 | Japan        | Insufficient data obtained          | Data grouped and severity of valve disease not provided. Outcome not specifically linked to lesion                                    |
| 136 | Suntharalingam  | 2000 | UK           | Less than 5 cases                   |                                                                                                                                       |
| 137 | Taha            | 2012 | Egypt        | Insufficient data obtained          | Data grouped and severity of valve disease not provided. Outcome not specifically linked to lesion                                    |
| 138 | Takana          | 1986 | Japan        | Insufficient data obtained          | Mixed population of heart disease. Data grouped and severity of valve disease not provided. Outcome not specifically linked to lesion |
| 139 | Tang            | 1985 | China        | Not lesion of interest              | Reported on mitral prolapse only, no quantification of mitral regurgitation                                                           |

|     |          |      |              |                                     |                                                                                                                                       |
|-----|----------|------|--------------|-------------------------------------|---------------------------------------------------------------------------------------------------------------------------------------|
| 140 | Tanous   | 2010 | Canada       | Insufficient data obtained          | Mixed population of heart disease. Data grouped and severity of valve disease not provided. Outcome not specifically linked to lesion |
| 141 | Trehan   | 2005 | India        | No outcome of interest              | Pregnant patients with MS, reported PMBV outcome but did not report obstetric or neonatal outcomes.                                   |
| 142 | Turan    | 2012 | Turkey       | Not lesion of interest              | Only mild to moderate mitral stenosis evaluated. Did not separate outcomes based on severity of valve lesion.                         |
| 143 | Tzemoz   | 2009 | Canada       | Duplicate Data                      | Duplicate data/overlap to Silversides 2003. This paper did not provide obstetric/neonatal outcomes.                                   |
| 144 | Vosloo   | 1987 | South Africa | All patients underwent intervention | Case series of closed mitral commissurotomy                                                                                           |
| 145 | Wu       | 2016 | China        | Insufficient data obtained          | Data grouped and severity of valve disease not provided. Outcome not specifically linked to lesion                                    |
| 146 | Yaghoubi | 2013 | Iran         | Insufficient data obtained          | Data grouped and severity of valve disease not provided. Outcome not specifically linked to lesion                                    |
| 147 | Yates    | 2014 | UK           | Less than 5 cases                   |                                                                                                                                       |
| 148 | Ziskind  | 1990 | Israel       | All patients underwent intervention | Case series of emergency cesarean section in mitral stenosis followed by open mitral commissurotomy                                   |

PMBV=percutaneous mitral balloon valvuloplasty

**Supplementary Table 2: Details of outcomes in mitral stenosis**

| Outcome        | Details                                                                                                                                                                                                                                                                                                                                                                                                                                                                                                                                                                                                                                                                                                                                                                                                                                                                                                                                                                                                                                                                                                           |
|----------------|-------------------------------------------------------------------------------------------------------------------------------------------------------------------------------------------------------------------------------------------------------------------------------------------------------------------------------------------------------------------------------------------------------------------------------------------------------------------------------------------------------------------------------------------------------------------------------------------------------------------------------------------------------------------------------------------------------------------------------------------------------------------------------------------------------------------------------------------------------------------------------------------------------------------------------------------------------------------------------------------------------------------------------------------------------------------------------------------------------------------|
| Maternal Death | <ul style="list-style-type: none"> <li>• 1 with severe MS died at 35 weeks of pregnancy from acute heart failure</li> <li>• 2 with severe MS died after percutaneous mitral balloon valvuloplasty during the 2<sup>nd</sup> trimester of pregnancy <ul style="list-style-type: none"> <li>• 1 from pulmonary edema and hypoxia</li> <li>• 1 from a massive cerebrovascular accident with a known history of atrial fibrillation</li> </ul> </li> <li>• 1 with severe MS died from acute respiratory distress after mitral valve replacement surgery during the 2<sup>nd</sup> trimester of pregnancy</li> <li>• 1 with severe MS died 36 weeks post-partum due to refractory heart failure</li> <li>• 1 with severe MS died 2 weeks after spontaneous abortion complicated by sepsis, atrial fibrillation and cardiogenic shock</li> <li>• 1 with moderate MS died 2 weeks post-partum during cardiac arrest after developing severe abdominal pain and dyspnea. She had developed atrial fibrillation and was started on heparin but this was stopped due to hemorrhage of the cesarean section wound</li> </ul> |
| Stillbirth     | <ul style="list-style-type: none"> <li>• 3 were related to maternal death post intervention for severe MS</li> <li>• 1 was attributed to delayed PMBV in severe MS</li> <li>• 1 was due to placental abruption in a case of severe MS</li> <li>• 1 occurred in the setting of persistent symptomatic severe MS.</li> <li>• 2 occurred in association with maternal pulmonary edema (one in moderate and one in severe MS)</li> <li>• 3 were attributed to fetal SGA status in mothers with moderate MS</li> <li>• details were unavailable for 6 (four with moderate and two with severe MS)</li> </ul>                                                                                                                                                                                                                                                                                                                                                                                                                                                                                                           |
| Neonatal Death | <ul style="list-style-type: none"> <li>• 1 death occurred in a preterm infant due to respiratory distress (days of life at death was not reported)</li> <li>• 1 death occurred in an infant at day seven of life (GA at delivery was not provided)</li> <li>• 2 deaths were not incorporated into the analysis as the study did not clearly report maternal MS severity grade.<sup>18</sup> <ul style="list-style-type: none"> <li>• One infant was born prematurely at 34 weeks GA and died at one week of life from pneumonia.</li> <li>• 1 death occurred in an infant born at 26 weeks GA by cesarean section due to fetal distress. They were admitted to the NICU with ARDS and died within 1 week.</li> </ul> </li> </ul>                                                                                                                                                                                                                                                                                                                                                                                  |

ARDS = acute respiratory distress syndrome, GA=gestational age, MS=mitral stenosis, NICU = neonatal intensive care unit, PMBV = percutaneous mitral balloon valvuloplasty, SGA=small for gestational age

**Supplementary Table 3: Details of outcomes in aortic stenosis**

| Outcome        | Details                                                                                                                                                                                                                                                                                                                      |
|----------------|------------------------------------------------------------------------------------------------------------------------------------------------------------------------------------------------------------------------------------------------------------------------------------------------------------------------------|
| Maternal Death | <ul style="list-style-type: none"> <li>• 1 died with undiagnosed severe AS during cardiopulmonary arrest at the time of cesarean delivery</li> <li>• 1 died 10 days postpartum at the time of aortic valve replacement</li> </ul>                                                                                            |
| Stillbirth     | <ul style="list-style-type: none"> <li>• 1 occurred in a mother with undiagnosed severe AS during cardiopulmonary arrest at the time of cesarean delivery</li> </ul> <p>(2 miscarriages in mothers with moderate AS were reported before 24 weeks but the exact gestation at the time of fetal demise was not specified)</p> |
| Neonatal Death | <ul style="list-style-type: none"> <li>• 1 death occurred secondary to respiratory distress in a small for gestational age infant who was delivered at 30 weeks gestational age by cesarean delivery from a mother with severe AS</li> </ul>                                                                                 |

AS=aortic stenosis

Supplementary Table 4: Quality Assessment of Included Studies using the Newcastle-Ottawa Scale for Observational Studies

## Cohort Studies

| Study Name       | Year published | Representativeness | Selection | Exposure | Outcome not at start | Comparability | Outcome | Follow-up length | Follow-up cohort | Score (maximum 8) |
|------------------|----------------|--------------------|-----------|----------|----------------------|---------------|---------|------------------|------------------|-------------------|
| Al Kasab         | 1990           | *                  |           | *        | *                    |               | *       |                  | *                | 5                 |
| Clark            | 1985           |                    |           | *        |                      |               | *       | *                | *                | 4                 |
| Desai            | 2000           | *                  |           | *        |                      |               | *       |                  | *                | 4                 |
| Gumrukcuoglu     | 2013           | *                  |           | *        |                      |               | *       |                  | *                | 4                 |
| Ioscovich        | 2009           | *                  |           | *        |                      |               | *       |                  | *                | 4                 |
| Lesniak-Sobelga  | 2004           | *                  |           | *        | *                    |               | *       | *                | *                | 6                 |
| Orwat            | 2016           | *                  |           | *        | *                    |               | *       |                  | *                | 5                 |
| Silversides - AS | 2003           | *                  |           | *        | *                    |               | *       | *                | *                | 6                 |
| Silversides - MS | 2003           | *                  |           | *        | *                    |               | *       | *                | *                | 6                 |
| Yap              | 2008           | *                  |           | *        | *                    |               | *       | *                | *                | 6                 |
| Van Hagen        | 2018           | *                  |           | *        | *                    |               | *       |                  |                  | 4                 |

## Case Control Study

| Study Name | Year published | Definition | Representativeness | Selection/Controls | Definition/Controls | Comparability | Exposure | Exposure Control | Non-Response | Score (maximum 8) |
|------------|----------------|------------|--------------------|--------------------|---------------------|---------------|----------|------------------|--------------|-------------------|
| Hameed     | 2001           |            | *                  |                    | *                   |               | *        |                  |              | 3                 |

Supplementary Figures 1: Funnel plots for publication bias in severe mitral and aortic stenosis. Presented plots focused on studies describing the outcome of maternal and fetal mortality in the setting of severe mitral stenosis (A and B respectively), and maternal and fetal mortality in the setting of severe aortic stenosis (C and D respectively). No clear publication bias was identified.

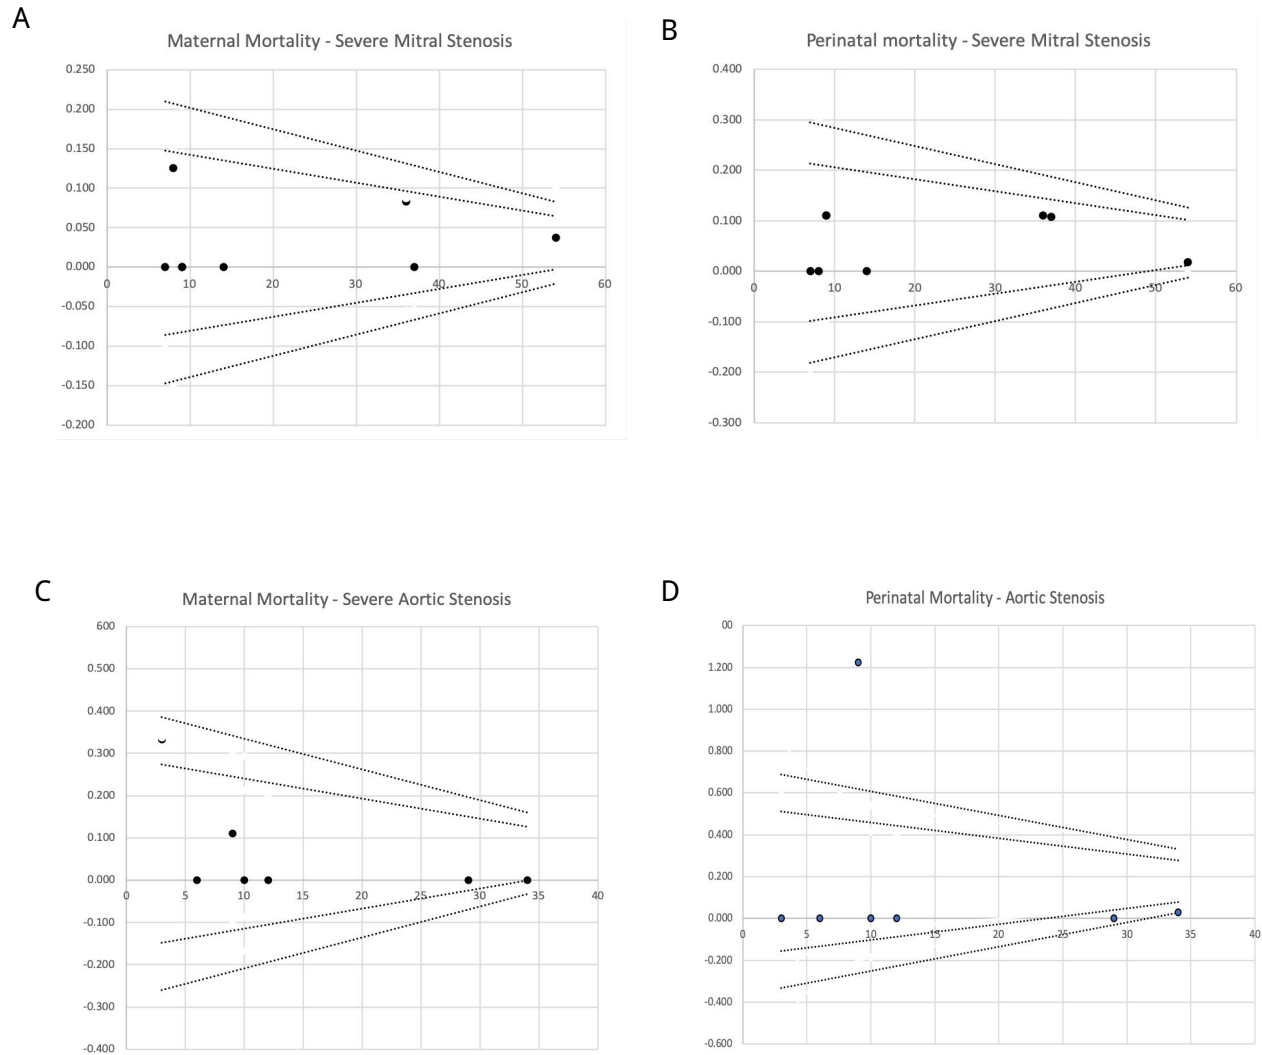



Supplementary figure 2: Forest plots for maternal and fetal death in severe mitral and aortic stenosis studies.

A: Forest plot for severe mitral stenosis and maternal death

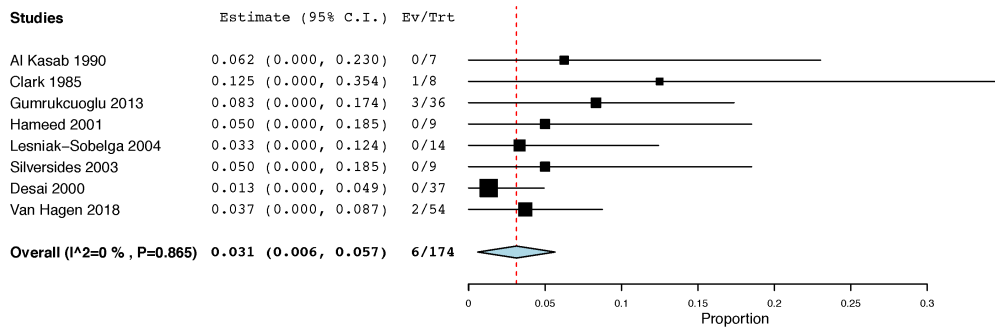

B: Forrest plot for severe mitral stenosis and fetal death

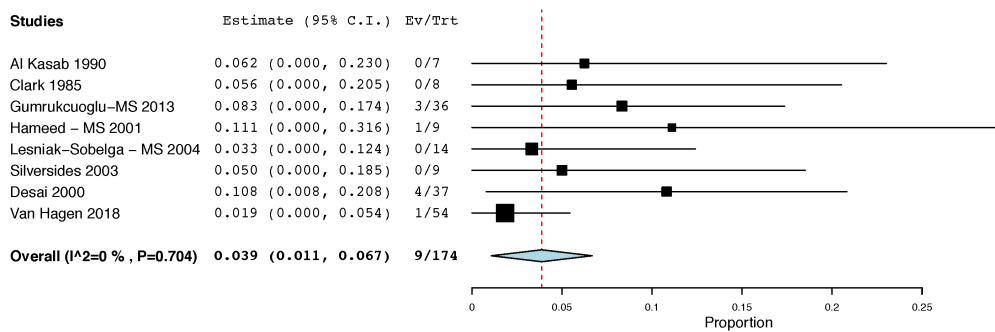

C: Forest plot for severe aortic stenosis and maternal death

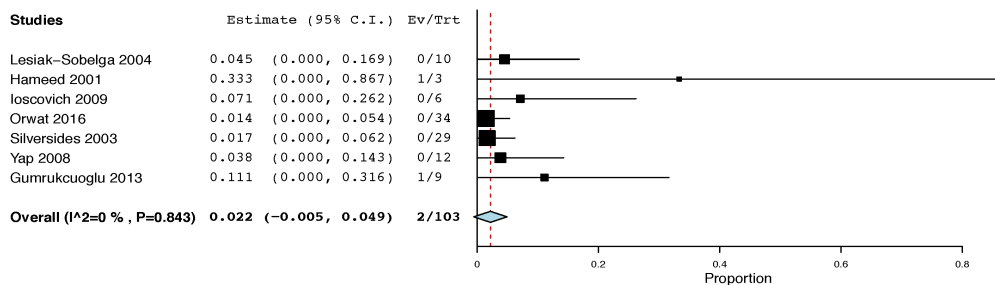

D: Forrest plot for severe aortic stenosis and fetal death

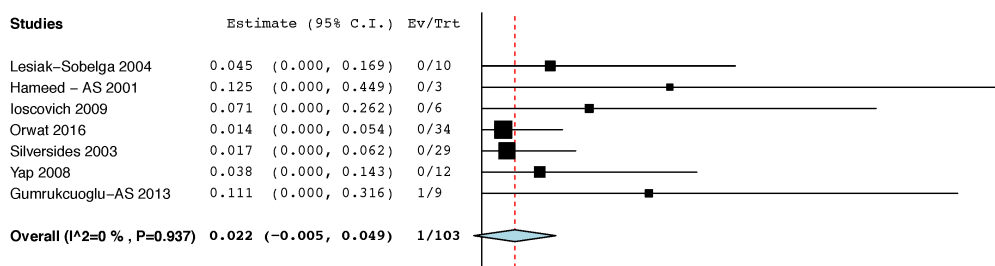

Supplementary figure 3: Forest plots for maternal and fetal death in severe aortic stenosis studies excluding Orwat ROPAC 2016 for their inclusion of prosthetic valves.

A: Forest plot for severe aortic stenosis and maternal death excluding study by Orwat et al.

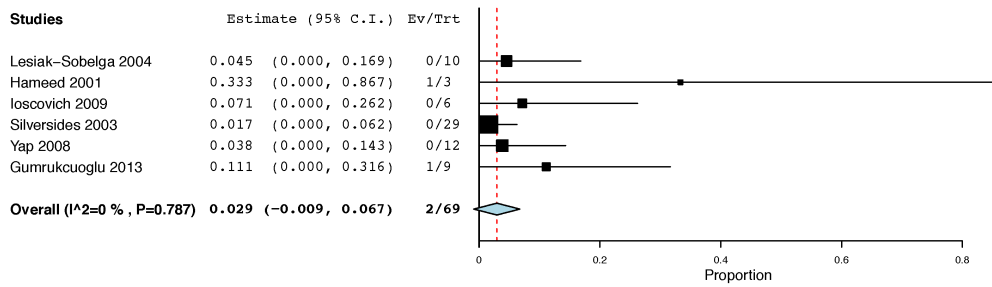

B: Forest plot for severe aortic stenosis and fetal death excluding study by Orwat et al.

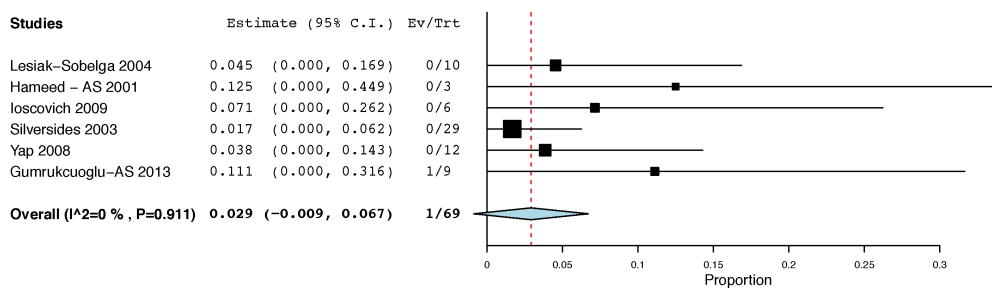

Supplement: inline-supplementary-material-1 [file inline-supplementary-material-1.pdf]
